# Supplementary material
Source: PubMed Central journal article supplement (PMC3675844)
Supplement: CJN.04680512_CJN04680512SupplementaryData.pdf [file CJN.04680512_CJN04680512SupplementaryData.pdf]

List of author and coauthors

---

| First Name | Last Name | Affiliations                         | Department or section       | City       | Country |
|------------|-----------|--------------------------------------|-----------------------------|------------|---------|
| Tsutomu    | Sanaka    | Edogawa Hospital                     | Internal Medicine           | Tokyo      | Japan   |
| Takahiro   | Mochizuki | University of Tokyo                  | Nephrology and Hypertension | Kamogawa   | Japan   |
| Eriko      | Kinugasa  | Showa University                     | Internal Medicine           | Yokohama   | Japan   |
| Eiji       | Kusano    | Jichi Medical University             | Nephrology                  | Shimotsuke | Japan   |
| Shigeru    | Ohwada    | Asao Clinic Dialysis Center          | Internal Medicine           | Kawasaki   | Japan   |
| Tsutomu    | Kuno      | Ikebukuro Kuno Clinic                | Internal Medicine           | Tokyo      | Japan   |
| Kenichiro  | Kojima    | Teikyo University School of Medicine | Nephrology                  | Tokyo      | Japan   |
| Shuzo      | Kobayashi | Shonan Kamakura General Hospital     | Internal Medicine           | Kamakura   | Japan   |
| Minoru     | Satoh     | Kawasaki Medical School              | Nephrology and hypertension | Kurashiki  | Japan   |

|         |            |                                   |                                            |          |       |
|---------|------------|-----------------------------------|--------------------------------------------|----------|-------|
| Noriaki | Shimada    | Koto Hospital                     | Nephrology                                 | Tokyo    | Japan |
| Kazushi | Nakao      | Okayama University                | Internal Medicine                          | Okayama  | Japan |
| Ryoichi | Nakazawa   | Tokatsu Clinic Hospital           | Nephrology                                 | Matsudo  | Japan |
| Hideki  | Nishimura  | Tokyo Woman's Medical University  | Internal Medicine                          | Tokyo    | Japan |
| Eisei   | Noiri      | Kameda Medical Center             | Hemodialysis and Apheresis                 | Tokyo    | Japan |
| Takashi | Shigematsu | Wakayama Medical University       | Nephrology and Blood purification Medicine | Wakayama | Japan |
| Tadashi | Tomo       | Oita University Hospital          | Nephrology                                 | Oita     | Japan |
| Teiryō  | Maeda      | Maeda Institute of Renal Research | Internal Medicine                          | Kawasaki | Japan |

---

List of the physicians listed in the acknowledge in VEESA Study Group

| Affiliation                        | First name | Last name |
|------------------------------------|------------|-----------|
| Showakai Hospital:                 | Ken        | Kihara    |
| Bosei Akabane Clinic:              | Hiroshi    | Kita      |
| Jujo Kidney Clinic:                | Minoru     | Chimata   |
| Okayama Saiseikai General Hospital | Jin        | Kusano    |
|                                    | Makoto     | Hiramatsu |
|                                    | Keisuke    | Maruyama  |
| Kawashima Medical Clinic:          | Naofumi    | Yamamoto  |
| Yukigaya Sanwa Clinic:             | Masanori   | Mukai     |
| Tachibana-dai Hospital:            | Nobuyuki   | Suzuki    |
|                                    | Takekazu   | Shimazu   |
| Asao Clinic:                       | Teruhiko   | Maeba     |
|                                    | Yasushi    | Kanno     |
| Shonan Kamakura General Hospital:  | Takayasu   | Ohtake    |
| Kameda General Hospital:           | Hiroshi    | Kataoka   |
|                                    | Nobuyuki   | Amemiya   |
|                                    | Mamiko     | Ohara     |

|                                      |           |           |
|--------------------------------------|-----------|-----------|
|                                      | Yoshihiko | Watanabe  |
|                                      | Kenji     | Yamaguchi |
| Nikko Citizen's Hospital:            | Tamaki    | Imai      |
| Horinouchi Hospital:                 | Kazushi   | Takahashi |
|                                      | Yoshiko   | Shimizu   |
| Komagome Ekimae Shin Clinic:         | Hiroyuki  | Takemura  |
| Kawaguchi Rokken Clinic:             | Taketoshi | Inokami   |
| Teraoka Memorial Hospital:           | Isao      | Kumagai   |
|                                      | Shinji    | Fukuda    |
| Okayama University Hospital:         | Kumiko    | Hirokoshi |
|                                      | Hiroko    | Kawamoto  |
|                                      | Nobuo     | Kajitani  |
|                                      | Naoko     | Yamashita |
| Shimodate Gastroenterology Hospital: | Yoichi    | Akai      |
| Tsukuba Central Hospital:            | Takashi   | Ishizu    |
|                                      | Isao      | Tadomega  |
| Shinsen Ikebukuro Clinic:            | Junichiro | Mera      |
| Gyotoku General Hospital:            | Koichi    | Hamaguchi |

|                                             |           |           |
|---------------------------------------------|-----------|-----------|
|                                             | Maho      | Ohmori    |
| Daini Eda Clinic:                           | Fumiyoshi | Nakayama  |
| Matsuyama Red Cross Hospital:               | Atsumi    | Harada    |
| Sato Clinic:                                | Yuzuru    | Sato      |
| Showa University yokohama northern hospital | Hidetoshi | Ito       |
|                                             | Hiroaki   | Ogata     |
|                                             | Masahiro  | Yamamoto  |
|                                             | Noriyo    | Yoshida   |
|                                             | Akiko     | Takejima  |
|                                             | Yukihiro  | Wada      |
| Bosei Shinjuku Minamiguchi Ekimae Clinic:   | Toshio    | Takahashi |
| Gyotoku Kidney Clinic:                      | Yuji      | Koyama    |
| Kojinkai Kimachi Hospital:                  | Emi       | Fujikura  |
|                                             | Masatsugu | Sato      |
|                                             | Shiro     | Oguma     |
|                                             | Jun       | Urae      |
| Oita Internal Medicine Clinic:              | Iehisa    | Matsuyama |
| Toshiba Rinkan Hospital:                    | Mitsuko   | Iwasaki   |

|                            |           |           |
|----------------------------|-----------|-----------|
|                            | Mikio     | Wakasa    |
| Oita University Hospital:  | Ken       | Tanaka    |
| Oita Nakamura Hospital:    | Makoto    | Matsuyama |
| Seijo Kidney Clinic:       | Shoko     | Mizuno    |
| Komae Kidney Clinic:       | Norio     | Miyabe    |
| Yujin Yamazaki Hospital:   | Daisuke   | Nagasaki  |
| Jichi Medical University:  | Nobuhiro  | Sasaki    |
| Nagahara Hospital:         | Masayuki  | Nagahara  |
| Miyamoto Clinic:           | Yoshihiko | Nishian   |
|                            | Takashi   | Miyamoto  |
| Hyogo College of Medicine: | Takahiro  | Kuragano  |
| Sakitama Clinic:           | Masakazu  | Murayama  |
